# Supplementary material
Source: publisher figshare collection journal article supplement (https://gsajournals.figshare.com/ndownloader/files/17412947)
Supplement: Supplementary file 1 [file 17412947]

## Sheet: Sheet1
Table S13 Barley flowering time genes with a signal of adaption, the number of SNPs genotyped in those genes and the number of SNPs outliers identified by environmental association and FST comparisons
Genes	9K_SNPs	SNP_outliers
HvVrn-H2/HvZCCT-Ha/b/c	1	0
HvPpd-H1/HvPRR37	8	4 or 5
HvVrn-H3/HvFT1	3	0
HvCEN	0	0
HvCO1	2	0 (2 if count row number)
HvCCA1/HvLHY	1	0
HvFT2	1	0
HvCO2	0	0
HvELF3/Esp1L/eam8	1	1
HvELF4-like protein	0	0
HvFKF1	0	0
HvPRR59	0	0
HvPRR95	1	0
HvPRR1/HvTOC1	2	1
HvPhyC	6	1 or 2
HvLUX/eps3L/ eam10	0	0
HvGI	0	0
HvGRP7	0	0
HvPpd-H2/HvFT3	1	1
HvVrn-H1/HvAP1	4	1
